# Supplementary material
Source: HighWire-hosted journal article supplement (https://bmjopen.bmj.com/content/14/2/e079820)
Supplement: inline-supplementary-material-4 [file inline-supplementary-material-4.pdf]

## Supplementary file 4: Input from PPI group summarised under the dimensions/sub-dimensions of quality framework

| Dimensions                | Input from PPI Group                                                                                                                                                                                                                                                                                                                                                                                                                                                                                                                                                                                                      | Incorporation of PPI input into framework dimensions                                                                                                                                                                                                                                                                                                                                                                                                                                                                               |
|---------------------------|---------------------------------------------------------------------------------------------------------------------------------------------------------------------------------------------------------------------------------------------------------------------------------------------------------------------------------------------------------------------------------------------------------------------------------------------------------------------------------------------------------------------------------------------------------------------------------------------------------------------------|------------------------------------------------------------------------------------------------------------------------------------------------------------------------------------------------------------------------------------------------------------------------------------------------------------------------------------------------------------------------------------------------------------------------------------------------------------------------------------------------------------------------------------|
| <b>Patient Experience</b> | <p><u>Professionalism:</u></p> <ul style="list-style-type: none"> <li>- Mannerisms of staff in some pharmacies is poor.</li> <li>- Anyone who has any interaction with customers' needs to be polite.</li> <li>- Staff do not have IDs which makes it hard to distinguish between staff.</li> </ul> <p><u>Patient experience:</u></p> <ul style="list-style-type: none"> <li>- Patients need to be put at the forefront of decision making – where is the patient voice?</li> </ul>                                                                                                                                       | <p><u>Professionalism:</u></p> <ul style="list-style-type: none"> <li>- <i>Pharmacy staff being distinguishable by wearing a name badge with their role.</i></li> <li>- <i>Mannerisms of pharmacy staff</i></li> </ul> <p><u>Patient Experience:</u></p> <ul style="list-style-type: none"> <li>- <i>Involving patients in decision making</i></li> </ul>                                                                                                                                                                          |
| <b>Integration</b>        | <ul style="list-style-type: none"> <li>- Integration is a huge element of quality. No sense that GPs/pharmacists speak to each other. GPs direct patients to pharmacies but pharmacies seem to be unaware. Pharmacies then direct patients back to GPs.</li> </ul>                                                                                                                                                                                                                                                                                                                                                        | <p><u>Communication mechanisms and information systems:</u></p> <ul style="list-style-type: none"> <li>- <i>Bi-directional communication between CPs and other providers.</i></li> </ul>                                                                                                                                                                                                                                                                                                                                           |
| <b>Access</b>             | <p><u>Waiting times</u></p> <ul style="list-style-type: none"> <li>- Services have gone downhill at community pharmacy. It takes longer to get a prescription.</li> </ul> <p><u>Availability of medicines</u></p> <ul style="list-style-type: none"> <li>- Difficult to encourage public to go to pharmacy for advice if they can't even get medications</li> <li>- Free prescription is not always available</li> </ul> <p><u>Availability of pharmacy staff</u></p> <ul style="list-style-type: none"> <li>- Huge tensions around single pharmacists having to do everything but not accessible to patients.</li> </ul> | <p><u>Waiting times</u></p> <ul style="list-style-type: none"> <li>- <i>Importance of waiting time for receiving prescriptions</i></li> </ul> <p><u>Availability of medicines</u></p> <ul style="list-style-type: none"> <li>- <i>Availability of medicines and offering alternatives.</i></li> </ul> <p><u>Availability of pharmacy staff</u></p> <ul style="list-style-type: none"> <li>- <i>Availability of pharmacy staff.</i></li> <li>- <i>Having adequate numbers and appropriately qualified pharmacy staff</i></li> </ul> |

|                    |                                                                                                                                                                                                                                                                                                                                                                                                         |                                                                                                                                                              |
|--------------------|---------------------------------------------------------------------------------------------------------------------------------------------------------------------------------------------------------------------------------------------------------------------------------------------------------------------------------------------------------------------------------------------------------|--------------------------------------------------------------------------------------------------------------------------------------------------------------|
|                    | <ul style="list-style-type: none"> <li>- Training received by pharmacy staff questionable.</li> <li>- There needs to be more training of pharmacy staff and this needs to be funded.</li> </ul>                                                                                                                                                                                                         |                                                                                                                                                              |
| <b>Environment</b> | <p><u>Appearance of the pharmacy</u></p> <p>Unlike GP or dentist, going to community pharmacy is like going to a shop. Not a healthcare environment.</p> <p><u>Private consultation area</u></p> <ul style="list-style-type: none"> <li>- Privacy issues – asking details such as address, DOB in front of people.</li> <li>- Providing room in pharmacies for consultations is a good thing</li> </ul> | <p><u>Private consultation area</u></p> <ul style="list-style-type: none"> <li>- <i>The importance of privacy and having a consultation area.</i></li> </ul> |
